# Supplementary material for: Petrogenesis of Lava from Christmas Island, Northeast Indian Ocean: Implications for the Nature of Recycled Components in Non-Plume Intraplate Settings
Source: MDPI journal article supplement (doi:10.3390/geosciences12030118), 2022-03-03
Supplement: s1 [file s1]

Archive with 8 entries (8 files):
- geosciences-1514323 - Supplementary Discussion.pdf
- geosciences-1514323_supplementary figures.pdf
- geosciences-1514323_supplementary Table S1.pdf
- geosciences-1514323_supplementary Table S2.pdf
- geosciences-1514323_supplementary Table S3.xlsx
- geosciences-1514323_supplementary Table S4.xlsx
- geosciences-1514323_supplementary Table S5.xlsx
- geosciences-1514323_supplementary Table S6.xlsx
