# Supplementary material for: Petrogenesis of Lava from Christmas Island, Northeast Indian Ocean: Implications for the Nature of Recycled Components in Non-Plume Intraplate Settings
Source: MDPI journal article supplement (doi:10.3390/geosciences12030118), 2022-03-03
Supplement: s1 [file s1 › geosciences-1514323_supplementary Table S1.pdf]

*Table S1: Dredge locations yielding rock material during the RV Franklin 1987 voyage (expedition FR 9/87)*

| FR 9/87 dredge no. | Dredge location                                           | Latitude (S)               | Longitude (E)            | Water depth (m) | Sample recovery                                         |
|--------------------|-----------------------------------------------------------|----------------------------|--------------------------|-----------------|---------------------------------------------------------|
| 3                  | SW slopes of Christmas Island offshore from Eugeria Point | S 10 28.57'<br>F 10 29.00' | 105 29.99'<br>105 31.30' | 1900-1700       | small pieces of basalt and limestone                    |
| 4                  | SW slopes of Christmas Island offshore from Eugeria Point | S 10 28.57'<br>F 10 29.00' | 105 29.99'<br>105 31.30' | 1900-1700       | full bag of limestone and basalt                        |
| 7                  | Scherbakov Seamount                                       | S 10 49.10'<br>F 10 50.29' | 104 44.46'<br>104 46.21' | 2200-2000       | full bag of reefal limestone some with basalt fragments |
| 8                  | Vening Meinesz Seamount "1341m"                           | S 11 20.75'<br>F 11 18.96' | 104 47.96'<br>104 47.91' | 2100-2000       | small fragments of mudstone/manganese crust             |
| 9                  | Vening Meinesz Seamount "1341m"                           | S 11 17.92'<br>F 11 17.54' | 104 45.29'<br>104 48.03' | 2500-2400       | small fragment of altered manganese crusted basalt      |
| 11                 | Vening Meinesz Seamount "1344m"                           | S 11 44.09'<br>F 11 44.44' | 103 16.51'<br>103 17.04' | 2200-1500       | one small rock fragment                                 |
| 14                 | Vening Meinesz Seamount "1763m"                           | S 11 37.60'<br>F 11 38.12' | 103 38.40'<br>103 41.63' | 2000-1500       | two small rock fragments                                |
| 15                 | Vening Meinesz Seamount "1763m"                           | S 11 37.78'<br>F 11 37.20' | 103 40.84'<br>103 41.02' | 1900-1700       | full bag of altered basalt                              |
