# Supplementary material for: Petrogenesis of Lava from Christmas Island, Northeast Indian Ocean: Implications for the Nature of Recycled Components in Non-Plume Intraplate Settings
Source: MDPI journal article supplement (doi:10.3390/geosciences12030118), 2022-03-03
Supplement: s1 [file s1 › geosciences-1514323_supplementary Table S2.pdf]

**Table S2.** Field notes and sample locations of Christmas Island volcanic rocks.

| Sample:                                        | Lava series | Outcrop | Float | Locality                                                                                                   |
|------------------------------------------------|-------------|---------|-------|------------------------------------------------------------------------------------------------------------|
| October 1987 field season Falloon et al. [222] |             |         |       |                                                                                                            |
| 70472                                          | LVS         | X       |       | Waterfall, dyke (80cm wide) exposed in wave cut platform                                                   |
| 70473                                          | LVS         | X       |       | Waterfall, cliff exposure on south side of the bay                                                         |
| 70477                                          | LVS         |         | X     | Flying Fish Cove, above the boat club below the yellow limestone                                           |
| 70479                                          | LVS         | X       |       | Dolly Beach, northerly dipping dyke exposed in wavecut platform                                            |
| 70452                                          | LVS         |         | X     | The Dales, near Hugh's Dale                                                                                |
| 70480                                          | LVS         | X       |       | Dolly Beach, sample taken just beneath cliff outcrop                                                       |
| 70467                                          | LVS         |         | X     | Greta Beach, taken from an old beach deposit just below an inland cliff                                    |
| 70470                                          | LVS         | X       |       | Environmental Trail                                                                                        |
| 70474                                          | LVS         | X       |       | Dolly Beach, cliff exposure                                                                                |
| 70475                                          | LVS         | X       |       | Ethel Beach, cliff exposure                                                                                |
| 70456                                          | LVS         |         | X     | The Dales, no.5                                                                                            |
| 70471                                          | LVS         |         | X     | Waterfall, basalt cobble from an uplifted reef deposit exposed in limestone cliffs just north of Waterfall |
| 70476                                          | LVS         |         | X     | Flying Fish Cove, hyaloclastite sampled above the Boat Club                                                |
| 70469                                          | LVS         |         | X     | Environmental Trail                                                                                        |
| 70455                                          | LVS         |         | X     | The Dales                                                                                                  |
| 70478                                          | LVS         |         | X     | Flying Fish Cove, actual outcrop exposed higher up in the cliff behind the Kampong                         |
| 70481                                          | LVS         | X       |       | Dolly Beach, aphyric lava flow                                                                             |
| 70457                                          | UVS         | X       |       | Winifred Beach, vesicular basalt flow                                                                      |
| 70458                                          | UVS         |         | X     | Winifred Beach                                                                                             |
| 70453                                          | UVS         |         | X     | The Dales                                                                                                  |
| 70454                                          | UVS         |         | X     | The Dales                                                                                                  |
| 70459                                          | UVS         | X       |       | Winifred Beach, lava flow                                                                                  |
| 70461                                          | UVS         |         | X     | Winifred Beach                                                                                             |
| 70462                                          | UVS         | X       |       | Winifred Beach, lava cobble from an agglomerate                                                            |
| 70463                                          | UVS         | X       |       | Winifred Beach, lava cobble from an agglomerate                                                            |

**Table S2:** continued

| Sample:                                      | Lava series | Outcrop | Float | Locality                                            |
|----------------------------------------------|-------------|---------|-------|-----------------------------------------------------|
| August 2008 field season Hoernle et al. [10] |             |         |       |                                                     |
| CH1A                                         | UVS         |         | X     | Winifred Beach, blocks of slope debris              |
| CH1B                                         | UVS         |         | X     | Winifred Beach, blocks of slope debris              |
| CH2                                          | UVS         |         | X     | Winifred Beach                                      |
| CH3                                          | UVS         | X       |       | Winifred Beach                                      |
| CH4                                          | UVS         |         | X     | Winifred Beach                                      |
| CH7A                                         | UVS         |         | X     | The Dales, Hugh's Dale                              |
| CH7B                                         | UVS         |         | X     | The Dales, Hugh's Dale                              |
| CH5A                                         | LVS         |         | X     | The Dales, Hugh's Dale                              |
| CH5B                                         | LVS         |         | X     | The Dales, Hugh's Dale                              |
| CH6                                          | LVS         |         | X     | The Dales, Hug's Dale                               |
| CH8                                          | LVS         |         | X     | North East Point                                    |
| CH9                                          | LVS         | X       |       | Ross Hill Gardens; flow interbedded with limestones |
| CH10                                         | LVS         |         | X     | Dolly Beach                                         |
| CH11                                         | LVS         |         | X     | Dolly Beach                                         |
| CH12                                         | LVS         | X       |       | Dolly Beach; block from agglomerate                 |
| CH13                                         | LVS         | X       |       | Dolly Beach; dike                                   |
| Hart [43]                                    |             |         |       |                                                     |
| X-1                                          | LVS         | X       |       | Waterfall                                           |
| X-2                                          | LVS         | X       |       | Flying Fish Cove                                    |
| X-3                                          | LVS         | X       |       | Environmental Trail                                 |
| X-4                                          | LVS         | X       |       | Dolly Beach                                         |
| X-5                                          | LVS         | X       |       | Deans Point                                         |
