# Supplementary material for: Petrogenesis of Lava from Christmas Island, Northeast Indian Ocean: Implications for the Nature of Recycled Components in Non-Plume Intraplate Settings
Source: MDPI journal article supplement (doi:10.3390/geosciences12030118), 2022-03-03
Supplement: s1 [file s1 › geosciences-1514323_supplementary Table S3.xlsx]

## Sheet: EDS microprobe data
Table S3: Representatitve mineral chemistry from Christmas Island volcanic rocks
Sample No	Analysis no	Type	Mineral	Comment	SiO2	TiO2	Al2O3	Cr2O3	FeO	MnO	MgO	CaO	Na2O	K2O	P2O5	Cl	Probe Total		Mg#	Ca#	Cr#
Lower Volcanic Series
70476	1	Area Scan	groundmass	glass + microlites	47.79	4.75	13.73		12.03		4.97	10.83	3.62	1.67	0.63		98.53		42.403
70476	2	Area Scan	groundmass	glass + microlites	47.97	4.76	13.69		12.04		5.01	10.81	3.38	1.69	0.66		97.15		42.5786
70476	3	Area Scan	groundmass	glass + microlites	47.7	4.71	13.68		12.16		5.16	10.74	3.34	1.77	0.73		97.24		43.0581
70476	4	Area Scan	groundmass	glass + microlites	47.93	4.79	13.72		11.96		4.96	10.79	3.44	1.74	0.66		96.73		42.4964
70476	5	Area Scan	groundmass	glass + microlites	47.78	4.72	13.96		12.13		5.02	10.71	3.15	1.74	0.78		96.81		42.4453
70476	6	Area Scan	groundmass	glass + microlites	48.04	4.62	13.9		12.1		4.92	10.81	3.13	1.69	0.78		96.96		42.0148
70476	7	Area Scan	groundmass	glass + microlites	48.09	4.74	13.81		12.09		4.93	10.85	3.14	1.72	0.62		96.54		42.0845
70476	8	Area Scan	groundmass	glass + microlites	48.47	4.66	13.75		12.12		4.87	10.75	3.16	1.65	0.56		95.06		41.726
70476	165	Spot	olivine	phenocryst	39.66				16.69		43.65						97.87		82.3338
70476	166	Spot	olivine	phenocryst	39.62				16.56		43.67						99.15		82.4539
70476	167	Spot	olivine	phenocryst	39.36				16.64		43.2						98.44		82.2264
70476	169	Spot	clinopyroxene	phenocryst	47.38	3.39	5.91	0.92	7		13.02	22.04		0.33			99.99		76.8224
70456	2	Spot	olivine	phenocryst core	38.71				18.99		42.13	0.17					102.87		79.8119
70456	3	Spot	olivine	phenocryst rim	37.32				25.42	0.29	36.8	0.17					103.37		72.0651
70456	4	Spot	olivine	phenocryst core	37.8				22.67	0.3	39.12	0.12					101.69		75.4605
70456	5	Spot	olivine	phenocryst rim	38.14				21.74	0.23	39.88						100.32		76.5748
70456	19	Spot	olivine	phenocryst oliv	38.06				22.32	0.25	39.18	0.19					99.62		75.7756
70456	14	Spot	olivine	phenocryst core	37.89				22.7	0.22	39.04	0.16					103.29		75.398
70456	15	Spot	olivine	phenocryst rim	38.03				22.19		39.78						100.56		76.1597
70456	2	Spot	olivine	phenocryst core	38.71				18.99		42.13	0.17					102.87		79.8119
70456	3	Spot	olivine	phenocryst rim	37.32				25.42	0.29	36.8	0.17					103.37		72.0651
70456	4	Spot	olivine	phenocryst core	37.8				22.67	0.3	39.12	0.12					101.69		75.4605
70456	5	Spot	olivine	phenocryst rim	38.14				21.74	0.23	39.88						100.32		76.5748
70456	19	Spot	olivine	phenocryst core	38.06				22.32	0.25	39.18	0.19					99.62		75.7756
70456	14	Spot	olivine	phenocryst core	37.89				22.7	0.22	39.04	0.16					103.29		75.398
70456	15	Spot	olivine	phenocryst rim	38.03				22.19		39.78						100.56		76.1597
70456	12	Spot	clinopyroxene	phenocryst core	49.74	1.74	4.69	0.4	7.55		15.46	20.1	0.32	0.31			95.76		78.4898
70456	13	Spot	clinopyroxene	phenocryst rim	48.93	2.11	5.14		7.18		14.19	22.16	0.3	0.26			98.54		77.8849
70456	6	Spot	plagioclase	phenocryst core	52.99		29.88		0.36			12.7	3.75	0.31			97.91			65.1755
70456	7	Spot	plagioclase	phenocryst rim	51.43		30.74		0.58			13.78	3.21	0.26			97.7			70.3468
70456	17	Spot	plagioclase	phenocryst core	52.52		30.1		0.43			12.96	3.69	0.3			97.85			65.997
70456	18	Spot	plagioclase	phenocryst rim	52.57	0.22	29.37		0.83		0.28	12.34	3.96	0.43			98.24			63.2631
70456	31	Spot	plagioclase	phenocryst core	51.82		30.43		0.51			13.44	3.51	0.29			99.29			67.9078
70456	32	Spot	plagioclase	phenocryst rim	51.89		30.36		0.54			13.37	3.48	0.37			99.24			67.981
70456	8	Spot	plagioclase	microlite	54.64	0.31	28.13		0.68		0.3	10.47	4.78	0.69			98.8			54.7603
70456	21	Spot	plagioclase	microlite	54.74	0.31	27.73		0.93		0.37	10.75	4.51	0.65			97.06			56.8449
70456	27	Spot	plagioclase	microlite	57.94	0.26	26.29		0.42			8.17	5.78	1.15			98.83			43.8558
70456	11	Spot	clinopyroxene	microlite	50.4	1.99	2.58		9.4		14.32	21.05	0.26				96.31		73.0799
70456	20	Spot	clinopyroxene	microlite	49.98	2.06	2.68		10.1	0.23	13.46	21.48					96.37		70.3688
70456	22	Spot	clinopyroxene	microlite	45.74	4.05	6.61		9.98		11.73	21.45	0.43				96.29		67.6843
70456	23	Spot	clinopyroxene	microlite	45.67	3.78	6.76	0.21	10.09		11.92	21.08	0.5				99.62		67.7959
70456	28	Spot	clinopyroxene	microlite	49.66	2.06	2.81		10.44		13.24	21.06	0.32				99.66		69.3244
70456	30	Spot	clinopyroxene	microlite	50.23	1.81	2.55		10.58		13.14	21.37	0.32				98.01		68.8781
70456	10	Spot	ilmenite	microlite		49.91	0.23		47.2	0.47	2.2						93.24		7.66893
70456	24	Spot	ilmenite	microlite		49.82			47.11	0.43	2.35	0.29					96.34		8.1635
70456	nr*	Spot	ilmenite	microlite		48.83	0.68	0.43	44.33	0.29	5.94						94.66		19.2753
70456	nr	Spot	ilmenite	microlite		48.33	0.68	0.43	44.33	0.29	5.94						94.66		19.2753
70480	2	Spot	olivine	microphenocryst core	39.77				16.22		43.72	0.21					100.83		82.7683
70480	3	Spot	olivine	microphenocryst rim	38.9				19.86		41.01	0.24					101.13		78.6313
70480	24	Spot	olivine	phenocryst core	38.49				20.76		40.6	0.16					103.07		77.7035
70480	25	Spot	olivine	phenocryst rim	39.35				17.56		42.86	0.23					102.9		81.3065
70480	30	Spot	olivine	phenocryst core	38.95				18.79		42.26						101.98		80.0313
70480	31	Spot	olivine	phenocryst rim	39.04				18.01		42.66	0.29					nr		80.8465
70480	32	Spot	olivine	phenocryst rim	39.56				16.14	0.22	43.84	0.25					102.62		82.8776
70480	35	Spot	olivine	phenocryst core	38.35				19.53		41.95	0.17					nr		79.2861
70480	56	Spot	olivine	phenocryst core	38.95				18.87		42.04	0.14					101.02		79.8795
70480	57	Spot	olivine	phenocryst rim	37.6				24.39	0.29	37.37	0.34					102.37		73.1928
70480	58	Spot	olivine	phenocryst core	39.11				17.94		42.77	0.18					101.89		80.9465
70480	59	Spot	olivine	phenocryst rim	37.01				27.97	0.36	34.3	0.36					101.75		68.6056
70480	28	Spot	olivine	inclusion in clinopyroxene	38.83				19.38	0.25	41.4	0.14					103.34		79.1959
70480	21	Spot	clinopyroxene	phenocryst core	53.03	0.76	3.79	0.5	5.34		16.29	20.3					97.29		84.4626
70480	22	Spot	clinopyroxene	phenocryst rim	49.77	1.63	4.58	0.9	5.68		15.31	21.72	0.41				99.75		82.7682
70480	26	Spot	clinopyroxene	phenocryst core	52.05	1.04	3.05	0.76	5.76		17.03	20.02	0.29				100.58		84.0476
70480	27	Spot	clinopyroxene	phenocryst rim	50.74	1.49	3.97	1.02	5.38		15.21	22.19					99.53		83.4381
70480	29	Spot	clinopyroxene	phenocryst core	52.34	0.74	2.98	1.04	5.71		17.23	19.63	0.32				100.35		84.3191
70480	33	Spot	clinopyroxene	phenocryst core	50.19	1.63	4.38	0.6	5.99		15.05	22.16					100.93		81.7428
70480	62	Spot	clinopyroxene	phenocryst core	51.25	1.29	3.29	0.62	5.37		16	22.18					99.92		84.1508
70480	63	Spot	clinopyroxene	phenocryst rim	50.82	1.74	2.9	0.21	6.88		14.85	22.21	0.39				100.54		79.3657
70480	5	Spot	clinopyroxene	microlite	47.28	3.74	5.8		7.99		12.77	22.03	0.38				98.24		74.0129
70480	7	Spot	clinopyroxene	microlite	48.95	2.6	5	0.36	7.74		14.13	21.22					98.71		76.4882
70480	9	Spot	clinopyroxene	microlite	48.88	2.5	5.47		9.12		13.37	20.66					97.59		72.3177
70480	12	Spot	clinopyroxene	microlite	50.91	1.84	2.8	0.2	7.31		15.07	21.62	0.25				100.62		78.6036
70480	17	Spot	clinopyroxene	microlite	48.29	2.68	5.63	0.44	6.92		14.2	21.44	0.39				99.29		78.5255
70480	18	Spot	clinopyroxene	microlite	49.2	2.37	4.32	0.41	7.28		14.71	21.45	0.25				99.73		78.2642
70480	4	Spot	plagioclase	microlite	53.6		29.22		0.55			12.24	3.94	0.45			100.17			63.1916
70480	6	Spot	plagioclase	microlite	57.21	0.23	26.46		0.63			8.73	5.38	1.35			100.28			47.2776
70480	10	Spot	plagioclase	microlite	53.57	0.27	29.05		0.61			11.91	4.08	0.52			100.89			61.7323
70480	13	Spot	plagioclase	microlite	52.35	0.23	29.09		1.22		0.73	12.44	3.48	0.45			100.57			66.3918
70480	19	Spot	plagioclase	microlite	64.83		20.19		0.52			1.45	4.97	8.04			100.98			13.8842
70480	8	Spot	ilmenite	microlite	2.51	46.46	0.71		46.78	0.62	1.54	0.7		0.28	0.4		93.66		5.54126
70480	11	Spot	ilmenite	microlite	0.82	48.61	0.5		46.84	0.61	2.18	0.31		0.13			95.6		7.65848
70480	20	Spot	ilmenite	microlite		49.47	0.21		47.54	0.62	2.17						96.47		7.52219
70480	23	Spot	titanomagnetite	inclusion in clinopyroxene	1.24	29.01	2.46		63.81	0.77	2.34	0.37					92.12		6.13397
70469	60	Spot	olivine	xenocryst core	41.48				8.63		49.46						nr		91.0817
70469	61	Spot	olivine	xenocryst rim	39.68				15.64	0.22	43.96	0.13					nr		83.3575
70469	62	Spot	olivine	phenocryst core	41.49				8.6		49.56						nr		91.1263
70469	63	Spot	olivine	xenocryst rim	39.57				16.57		43.71	0.16					nr		82.4584
70469	64	Spot	olivine	xenocryst core	41.36				8.92		49.39						nr		90.7977
70469	65	Spot	olivine	phenocryst rim	39.94				16.1		43.78	0.18					nr		82.8934
70469	68	Spot	olivine	xenocryst core	41.43				8.76		49.33						nr		90.9378
70469	69	Spot	olivine	xenocryst core	41.47				8.88		49.28						nr		90.8166
70469	77	Spot	olivine	xenocryst core	41.35				10.39		48.26						nr		89.2208
70469	84	Spot	olivine	microphenocryst core	39.78				16.57		43.46	0.18					nr		82.3752
70469	85	Spot	olivine	microphenocryst rim	38.46				22.44	0.26	38.59	0.25					nr		75.3967
70469	70	Spot	clinopyroxene	phenocryst core	53.27	0.86	1.9	0.57	5.49		17.09	20.82					nr		84.7264
70469	72	Spot	clinopyroxene	phenocryst core	52.92	0.87	2.29	0.52	5.25		17	21.15					nr		85.2295
70469	73	Spot	clinopyroxene	phenocryst core	53.11	0.79	2.02	0.38	5.17		17.05	21.49					nr		85.4583
70469	80	Spot	clinopyroxene	phenocryst core	52.3	1.08	2.25	0.67	6.05		16.62	20.69	0.35				nr		83.0374
70469	81	Spot	clinopyroxene	phenocryst core	52.4	0.93	2.55	1.27	6.05		17.44	19.08					nr		83.705
70469	83	Spot	clinopyroxene	phenocryst core	53.35	0.68	1.64	1.37	5.8		18.51	18.4	0.26				nr		85.0457
70469	76	Spot	clinopyroxene	microlite	50.28	2.07	3.27	0.46	7.62		14.23	21.74	0.32				nr		76.8935
70469	87	Spot	clinopyroxene	microlite	50.88	1.79	3.43	0.31	7.48		15.4	20.71					nr		78.5813
70469	nr	Spot	plagioclase	phenocryst core	54.85	0.23	28.09		0.58			10.99	4.83	0.43			nr			55.7015
70469	nr	Spot	plagioclase	microlite	66.35		19.78		0.26			1.08	6.72	5.8			nr			8.15696
70469	nr	Spot	plagioclase	microlite	61.43	0.31	23.56		0.54			5.26	7.19	1.5	0.21		nr			28.7892
70469	nr	Spot	titanomagnetite	microlite		30.03	1.34		65.25	0.79	2.14	0.45					nr		5.52169
70469	nr	Spot	titanomagnetite	microlite		24.19	1.63		71.95	0.38	1.64	0.2					nr		3.90326
Upper Volcanic Series
70454	1	Area Scan	groundmass	glass + microlites	43.72	2.59	14.18	0.23	10.54		8.25	13.92	2.78	2.71	0.86	0.22	96.94		58.2433
70454	2	Area Scan	groundmass	glass + microlites	44.4	2.56	15.46		9.58		6.8	13.11	3.65	3.29	0.91	0.26	95.98		55.8476
70454	3	Area Scan	groundmass	glass + microlites	44.45	2.34	15.04		10.03		7.48	12.91	3.4	3.18	0.89	0.28	96.72		57.0621
70454	4	Area Scan	groundmass	glass + microlites	44.58	2.46	14.86		9.34		7.15	14.42	3.17	2.94	0.85	0.22	96.85		57.7017
70454	5	Area Scan	groundmass	glass + microlites	44.47	2.5	15.63		9.68		6.59	13.39	3.41	3.24	0.88	0.22	96.56		54.8156
70454	6	Area Scan	groundmass	glass + microlites	44.3	2.42	14.77		9.72		8.18	13.59	3.02	2.84	0.92	0.23	97.77		59.9946
70454	40	Spot	clinopyroxene	microlite	48.16	1.92	5.5		7.2		13.78	23.44					97.9		77.327
70454	42	Spot	clinopyroxene	microlite	47.26	2.18	6.3		7.72		13.13	23.4					97.6		75.1909
70454	45	Spot	clinopyroxene	microlite	50.71	1.3	3.45	0.51	4.99		15.29	23.75					99.04		84.5207
70454	46	Spot	clinopyroxene	microlite	41.59	3.97	10.9		9.15		10.61	23.44	0.35				98.06		67.3878
70454	56	Spot	clinopyroxene	microlite	44.34	3.07	8.72		8.4		11.71	23.49	0.26				98.97		71.2989
70454	57	Spot	clinopyroxene	microlite	48.02	2.13	5.5		6.96		13.9	23.5					98.91		78.0647
70454	41	Spot	titanomagnetite	microlite	2.31	14.14	9.29		67.17	0.61	4.68	1.76					92.78		11.0446
70454	43	Spot	titanomagnetite	microlite		15.37	9.05		70.89	0.73	3.74	0.21					92.08		8.5935
70454	58	Spot	titanomagnetite	microlite	1.06	15.58	8.88		69.5	0.76	3.68	0.55					93.3		8.62205
70454	59	Spot	titanomagnetite	microlite		15.28	9.06		70.52	0.72	4.41						92.73		10.0265
70454	37	Spot	olivine	phenocryst core	40.57				11.96		47.48						100.29		87.6151
70454	38	Spot	olivine	phenocryst rim	40.33				13.72		45.57	0.38					99.91		85.5466
70454	39	Spot	olivine	phenocryst core	39.85				14.25		45.18	0.4					101.36		84.9621
70454	47	Spot	olivine	phenocryst core	40.39				12.57		46.93	0.11					101.22		86.9333
70454	48	Spot	olivine	phenocryst rim	40.31				13.53		45.77	0.39					101.08		85.7717
70454	52	Spot	olivine	phenocryst core	40.64				11.15		48.21						100.51		88.5123
70454	53	Spot	olivine	phenocryst rim	40				14.57		45.08	0.35					100.91		84.6474
70454	61	Spot	olivine	phenocryst core	41.23				10.16		48.62						100.79		89.5042
70454	62	Spot	olivine	phenocryst rim	39.97				14.12		45.36	0.33					101		85.1292
70454	72	Spot	olivine	phenocryst core	40.68				11.38		47.94						101.46		88.2449
70454	49	Spot	chromium spinel	inclusion in olivine phenocryst	0.64	4.14	12.7	42.07	29.03		11.42						95.39		41.2115		68.9569
70454	84	Spot	chromium spinel	inclusion in olivine phenocryst		1.04	19.34	41.47	24.44		13.71						98.73		49.9909		58.9807
70454	60	Spot	chromium spinel	inclusion in olivine phenocryst		0.43	21.11	41.59	21.59		14.45						99.52		54.3936		56.9175
70454	68	Spot	chromium spinel	microphenocryst		0.97	19.9	42.35	25.05		11.73						98.26		45.4875		58.798
70454	50	Spot	clinopyroxene	phenocryst core	51.41	1.18	2.89	0.46	4.59		15.44	24.02					98.86		85.7027
70454	51	Spot	clinopyroxene	phenocryst rim	45.12	2.77	8.27	0.37	7.16		12.48	23.51	0.31				99.46		75.6457
70454	63	Spot	clinopyroxene	phenocryst core	51.23	1.1	3	0.51	4.67		15.43	24.06					98.73		85.4816
70454	64	Spot	clinopyroxene	phenocryst rim	45.16	2.47	8.57		8.12		12.27	23.41					97.05		72.9199
70454	66	Spot	clinopyroxene	phenocryst core	48.41	1.66	5.37	0.61	5.84		14.07	23.71	0.34				99.06		81.1081
70454	67	Spot	clinopyroxene	phenocryst rim	46.47	2.55	7.04	0.28	6.67		13.21	23.78					97.72		77.9213
70463	1	Area Scan	groundmass	glass + microlites	46.21	2.25	15.28		10.44		6.11	12.75	2.7	3.36	0.74	0.16	100.92		51.0502
70463	2	Area Scan	groundmass	glass + microlites	46.49	2.27	15.21		10.26		6.06	12.9	2.57	3.34	0.74	0.15	98.58		51.2795
70463	3	Area Scan	groundmass	glass + microlites	46.55	2.27	15.17		10.19		6.18	13.02	2.42	3.28	0.73	0.18	97.83		51.9401
70463	4	Area Scan	groundmass	glass + microlites	46.57	2.26	14.42		9.83		6.98	13.81	2.16	2.97	0.81	0.19	99.63		55.8566
70463	5	Area Scan	groundmass	glass + microlites	46.56	2.13	14.93		10.09		6.4	13.47	2.4	3.14	0.72	0.15	98.26		53.0583
70463	6	Area Scan	groundmass	glass + microlites	46.83	2.19	15.51		10.36		5.89	12.14	2.6	3.45	0.86	0.15	98.06		50.3259
70463	7	Area Scan	groundmass	glass + microlites	46.35	2.32	15.18		10.08		6.34	12.92	2.62	3.26	0.72	0.2	99.02		52.8484
70463	8	Area Scan	groundmass	glass + microlites	46.33	2.26	15.23		10.05		6.27	12.92	2.47	3.42	0.81	0.24	99.52		52.6459
70463	33	Spot	clinopyroxene	microlite	47.75	1.76	5.97	0.96	6		14.01	23.31	0.24				101.14		80.6237
70463	34	Spot	clinopyroxene	microlite	49.34	1.34	4.34		6.32		14.64	23.52					100.65		80.4989
70463	35	Spot	clinopyroxene	microlite	47.82	1.95	6.17	0.85	6.07		13.92	23.24					101.29		80.3403
70463	36	Spot	clinopyroxene	microlite	47.95	1.95	5.96	0.93	5.81		13.98	23.42					100.95		81.0886
nr* = not recorded

## Sheet: Average groundmass compositions
Table S3: Average groundmass scans of Christmas Island lavas
Sample No	Comment	SiO2	TiO2	Al2O3	FeO	MgO	CaO	Na2O	K2O	P2O5
Lower Volcanic Series
70476	average (n=8)	47.94	4.72	13.78	12.08	4.98	10.79	3.3	1.71	0.68
	1std	0.23	0.05	0.1	0.06	0.08	0.05	0.17	0.04	0.07
Upper Volcanic Series
70454	average (n=6)	44.44	2.49	15.03	9.84	7.43	13.59	3.25	3.04	0.89
	1std	0.31	0.09	0.52	0.42	0.7	0.55	0.31	0.24	0.03
70463	average (n=8)	46.57	2.25	15.14	10.18	6.29	13.02	2.5	3.28	0.77
	1std	0.19	0.06	0.32	0.19	0.33	0.49	0.17	0.16	0.05
Groundmass scans recalculated to 100% anhydrous
