# Supplementary material for: Petrogenesis of Lava from Christmas Island, Northeast Indian Ocean: Implications for the Nature of Recycled Components in Non-Plume Intraplate Settings
Source: MDPI journal article supplement (doi:10.3390/geosciences12030118), 2022-03-03
Supplement: s1 [file s1 › geosciences-1514323_supplementary Table S4.xlsx]

## Sheet: Oliv
Table S4: Olivine mineral chemistry from Christmas Island volcanic rocks
Sample no.	SiO2	FeO	MnO	MgO	CaO	Cr2O3	NiO	TOTAL		Mg#
Lower Volcanic Series
70480/2-OL45	38.5051	20.7715	0.2842	40.354	0.2018	-0.0013	0.1593	100.275		77.5885
70480/2-OL5	38.6835	20.6713	0.3	40.3575	0.2122	0.0067	0.1629	100.394		77.674
70480/2-OL16	38.7584	19.7324	0.2574	41.043	0.2112	0.0151	0.1853	100.203		78.7529
70480/2-OL46	38.7731	19.6667	0.2792	41.0768	0.2074	0.0077	0.1854	100.196		78.8223
70480/2-OL37	38.8833	19.5747	0.28	41.3393	0.215	0.0104	0.1779	100.481		79.0064
70480/2-OL21	38.8829	19.5727	0.2821	41.4379	0.2131	0.0074	0.1755	100.572		79.0476
70480/2-OL17	38.5942	19.3817	0.2802	41.1969	0.2254	0.0088	0.1802	99.8674		79.1133
70480/2-OL42	38.6325	19.3173	0.2773	41.2596	0.2187	0.018	0.159	99.8824		79.1933
70480/2-OL19	38.726	19.3545	0.2501	41.3717	0.2312	0.0107	0.1771	100.121		79.2063
70480/2-OL27	38.7335	19.0109	0.2688	41.544	0.2052	-0.0055	0.1841	99.9409		79.5674
70480/2-OL48	38.8299	18.9956	0.272	41.5419	0.2289	0.0035	0.1934	100.065		79.5797
70480/2-OL4	39.2013	18.837	0.267	41.9985	0.2284	0.006	0.1885	100.727		79.8917
70480/2-OL30	38.917	18.6927	0.2563	41.8897	0.2214	0.0059	0.1898	100.173		79.9735
70480/2-OL3	39.0287	18.4768	0.2651	41.8568	0.2145	0.023	0.1767	100.041		80.1464
70480/2-OL22	38.6367	18.5438	0.2662	42.0189	0.2124	0.0263	0.2017	99.906		80.1503
70480/2-OL20	38.6285	18.5274	0.2651	42.047	0.2115	0.0086	0.1996	99.8877		80.175
70480/2-OL8	38.9252	18.4908	0.2893	42.0188	0.2038	0.0173	0.1793	100.125		80.1958
70480/2-OL15	38.9718	18.2944	0.2699	42.2064	0.3189	0.0091	0.1954	100.266		80.435
70480/2-OL39	38.7299	18.1948	0.2501	42.1408	0.2363	0.0265	0.1952	99.7736		80.4964
70480/2-OL24	38.9432	18.2176	0.2666	42.2927	0.2473	0.0075	0.2286	100.203		80.5332
70480/2-OL10	39.0253	17.9122	0.272	42.6116	0.251	0.0176	0.2074	100.297		80.9131
70480/2-OL36	39.0218	17.8629	0.2515	42.59	0.2725	0.0219	0.1912	100.212		80.9479
70480/2-OL6	39.1537	17.9031	0.2567	42.7405	0.2464	0.0104	0.2136	100.524		80.9676
70480/2-OL7	39.1726	17.7471	0.242	42.77	0.2332	0.0251	0.2197	100.41		81.1127
70480/2-OL2	39.3281	17.7277	0.2777	42.8104	0.3046	0.0207	0.202	100.671		81.1439
70480/2-OL9	39.1663	17.681	0.2471	42.7027	0.2303	0.01	0.1932	100.231		81.1457
70480/2-OL13	38.9521	17.6208	0.2576	42.5863	0.2915	0.0193	0.2134	99.9411		81.1561
70480/2-OL47	39.0791	17.5635	0.2523	42.7542	0.2424	0.0026	0.2231	100.117		81.2658
70480/2-OL25	38.8987	17.4975	0.2431	42.8266	0.2987	0.0179	0.2314	100.014		81.3488
70480/2-OL33	38.7572	17.3119	0.2616	42.6828	0.247	0.0349	0.2398	99.5352		81.4593
70480/2-OL44	39.1613	17.4978	0.2405	43.1508	0.2371	0.0147	0.2267	100.529		81.4627
70480/2-OL49	39.0056	17.2749	0.2369	42.6706	0.2399	0.0108	0.2465	99.6851		81.4873
70480/2-OL38	39.1173	17.301	0.2448	42.9559	0.2449	-0.0009	0.2472	100.11		81.5649
70480/2-OL32	39.4651	17.4163	0.2257	43.2593	0.2444	0.0126	0.1969	100.82		81.5709
70480/2-OL11	39.0997	17.2309	0.2285	43.1909	0.2458	0.0273	0.2237	100.247		81.7075
70480/2-OL34	39.0826	17.0974	0.2601	43.1673	0.298	0.0153	0.2287	100.149		81.8154
70480/2-OL14	39.3478	17.0542	0.2345	43.3175	0.2278	0.0269	0.2488	100.458		81.9046
70480/2-OL35	39.3694	16.9674	0.2097	43.2428	0.2165	0.0286	0.2597	100.294		81.9546
70480/2-OL29	38.9726	16.9302	0.2298	43.3496	0.2189	0.0309	0.2595	99.9914		82.0234
70480/2-OL26	39.5162	16.8703	0.2441	43.3554	0.2183	0.0113	0.263	100.479		82.0775
70480/2-OL28	39.0652	16.8502	0.2624	43.3093	0.2907	0.0232	0.2116	100.013		82.0794
70480/2-OL12	39.4766	16.8876	0.2218	43.5743	0.2197	0.0261	0.2527	100.659		82.1364
70480/2-OL41	39.1453	16.5075	0.2391	43.2757	0.2562	0.0297	0.2259	99.6794		82.3684
70480/2-OL23	39.3021	16.6392	0.2353	43.7151	0.2141	0.0034	0.2102	100.319		82.3996
70480/2-OL40	39.3949	16.5869	0.2416	43.7057	0.2954	0.0333	0.2215	100.479		82.4422
70480/2-OL50	39.361	16.1893	0.2241	43.8589	0.2404	0.0332	0.2993	100.206		82.8404
70480/2-OL1	39.7219	15.7541	0.239	44.4763	0.046	0.0158	0.2622	100.515		83.4185
70480/2-OL18	39.226	14.7156	0.2379	42.5894	0.2386	0.0067	0.1887	97.2028		83.7593
70480/2-OL43	39.3459	15.0096	0.2139	44.8652	0.2524	0.0384	0.2117	99.9371		84.1936
70480/2-OL31	39.5528	14.9641	0.2197	45.0401	0.2452	0.0494	0.2737	100.345		84.2856
70470/R1-MP51	37.42	26.3	0.43	34.88	0.39	0	0.1	99.52		70.2677
70470/R1-MP38	37.8	23.9	0.38	36.9	0.33	0.02	0.13	99.46		73.3424
70470/R2-MP23	37.87	23.65	0.35	36.92	0.3	0	0.1	99.19		73.5581
70470/R2-MP11	37.83	23.55	0.37	37.12	0.3	0.01	0.14	99.32		73.7451
70470/R1-MP37	38.48	22.42	0.33	38.35	0.28	0	0.15	100.01		75.2973
70470/R2-MP21	38.05	21.96	0.33	38.25	0.35	0.02	0.14	99.1		75.6328
70470/R1-MP32	38.54	21.69	0.33	39.02	0.33	0.03	0.12	100.06		76.2232
70470/R1-MP52	38.51	20.82	0.3	39.42	0.32	0.03	0.15	99.55		77.1375
70470/R1-MP40	38.35	20.87	0.3	39.62	0.27	0.03	0.17	99.61		77.1844
70470/R1-MP35	38.49	20.87	0.31	39.79	0.25	0.02	0.17	99.9		77.2597
70470/R2-MP2	38.47	20.7	0.31	39.72	0.34	0.03	0.16	99.73		77.3723
70470/R1-MP49	38.48	19.81	0.29	40.5	0.32	0.02	0.16	99.58		78.4629
70470/R1-MP48	38.82	18.77	0.28	41.46	0.3	0.01	0.16	99.8		79.7413
70470/R2-MP20	38.84	18.7	0.29	41.36	0.33	0.02	0.15	99.69		79.7626
70470/R1-MP27	38.98	18.39	0.26	41.47	0.32	0.02	0.17	99.61		80.0735
70470/R2-MP5	39	18.41	0.28	41.69	0.31	0.04	0.19	99.92		80.1405
70470/R1-MP36	39.06	18.3	0.28	41.73	0.26	0.03	0.2	99.86		80.2509
70470/R3-MP13	38.93	18.19	0.27	41.96	0.23	0.02	0.17	99.77		80.433
70470/R1-MP50	38.84	18.01	0.29	42.01	0.34	0.01	0.14	99.64		80.6076
70470/R2-MP14	38.9	17.81	0.27	41.89	0.28	0.03	0.2	99.38		80.7371
70470/R1-MP54	38.9	17.83	0.28	42.21	0.33	0.05	0.17	99.77		80.8378
70470/R2-P3 core	38.94	17.67	0.25	42.3	0.24	0.02	0.14	99.56		81.0099
70470/R1-MP33	39.07	17.3	0.26	42.49	0.31	0.03	0.16	99.62		81.4012
70470/R1-MP3	39.48	16.98	0.23	42.91	0.17	0.01	0.18	99.96		81.829
70470/R2-MP16	39.34	16.95	0.25	42.98	0.32	0.03	0.17	100.04		81.8794
70470/R1-MP29	39.33	16.75	0.25	43.26	0.22	0.03	0.24	100.08		82.1503
70470/R1-MP2	39.27	16.56	0.25	43.11	0.3	0.03	0.15	99.67		82.2663
70470/R1-MP10	39.16	16.46	0.23	43	0.29	0.03	0.17	99.34		82.3174
70470/R1-P2 rim	39.24	16.45	0.23	43.03	0.3	0.04	0.18	99.47		82.3364
70470/R3-MP8	39.18	16.41	0.24	42.93	0.26	0.03	0.16	99.21		82.3379
70470/R1-P7 rim	39.4	16.48	0.25	43.19	0.3	0.03	0.16	99.81		82.3638
70470/R1-P5 rim	39.21	16.42	0.24	43.35	0.28	0.03	0.15	99.68		82.4703
70470/R1-MP6	39.5	16.36	0.23	43.2	0.3	0.03	0.17	99.79		82.4731
70470/R3-MP11	39.24	16.44	0.22	43.42	0.27	0.07	0.16	99.82		82.476
70470/R1-P1 rim	39.36	16.33	0.24	43.14	0.3	0.04	0.16	99.57		82.4795
70470/R3-MP14	39.22	16.38	0.24	43.44	0.36	0.03	0.14	99.81		82.5354
70470/R1-MP4	39.33	16.31	0.24	43.32	0.26	0.03	0.16	99.65		82.5573
70470/R2-MP26	39.23	16.31	0.27	43.33	0.31	0.03	0.17	99.65		82.5606
70470/R3-MP12	39.14	16.34	0.24	43.43	0.26	0.04	0.17	99.62		82.5673
70470/R3-MP7	39.13	16.26	0.24	43.28	0.28	0.04	0.15	99.38		82.5882
70470/R1-MP1	39.34	16.28	0.22	43.41	0.28	0.05	0.17	99.75		82.6136
70470/R1-MP42	39.57	16.31	0.26	43.52	0.27	0.05	0.2	100.18		82.6235
70470/R1-MP46	39.45	16.44	0.23	43.87	0.28	0.03	0.19	100.49		82.6245
70470/R3-MP1	39.18	16.23	0.23	43.34	0.27	0.04	0.15	99.44		82.6346
70470/R3-MP5	39.29	16.27	0.24	43.47	0.27	0.04	0.16	99.74		82.6422
70470/R3-MP6	39.55	16.3	0.22	43.57	0.24	0.06	0.17	100.11		82.6488
70470/R1-MP45	39.33	16.23	0.26	43.57	0.29	0.05	0.17	99.9		82.7104
70470/R2-MP2	39.48	16.15	0.22	43.74	0.27	0.03	0.14	100.03		82.8364
70470/R3-MP4	39.58	16.07	0.19	43.76	0.22	0.02	0.11	99.95		82.9134
70470/R1-P2 rim	39.21	15.91	0.22	43.38	0.25	0.02	0.16	99.15		82.9315
70470/R3-MP9	39.46	16.03	0.24	43.74	0.24	0.04	0.15	99.9		82.9422
70470/R1-MP11	39.34	15.95	0.22	43.82	0.25	0.05	0.16	99.79		83.0386
70470/R2-MP15	39.47	15.98	0.22	44.04	0.24	0.03	0.25	100.23		83.0826
70470/R1-MP5	39.37	15.83	0.19	43.69	0.22	0.05	0.15	99.5		83.103
70470/R2-MP3	39.4	15.75	0.22	43.75	0.22	0.05	0.15	99.54		83.1932
70470/R2-MP10	39.31	15.77	0.23	43.92	0.27	0.04	0.22	99.76		83.2297
70470/R3-MP2	39.48	15.77	0.22	44	0.22	0.03	0.16	99.88		83.2551
70470/R1-MP34	39.41	15.68	0.23	43.91	0.3	0.04	0.17	99.74		83.3062
70470/R2-MP13	39.43	15.7	0.23	43.97	0.25	0.04	0.23	99.85		83.3075
70470/R2-MP25	39.79	15.72	0.23	44.09	0.24	0.03	0.23	100.33		83.3277
70470/R1-MP43	39.2	15.66	0.23	43.98	0.27	0.03	0.22	99.59		83.3461
70470/R3-MP3	39.63	15.68	0.22	44.04	0.23	0.03	0.19	100.02		83.3473
70470/R2-MP8	39.39	15.67	0.24	44.13	0.28	0.03	0.22	99.96		83.3845
70470/R2-MP1	39.65	15.66	0.22	44.21	0.24	0.03	0.24	100.25		83.4184
70470/R2-MP1	39.38	15.64	0.21	44.16	0.22	0.04	0.17	99.82		83.4204
70470/R2-MP22	39.61	15.58	0.24	44.21	0.25	0.05	0.23	100.17		83.4891
70470/R3-MP10	39.49	15.59	0.22	44.25	0.22	0.03	0.16	99.96		83.4927
70470/R1-MP8	39.5	15.53	0.22	44.18	0.17	0.02	0.19	99.81		83.524
70470/R1-MP47	39.55	15.5	0.23	44.46	0.24	0.01	0.24	100.23		83.6373
70470/R2-MP9	39.54	15.41	0.21	44.36	0.24	0.04	0.21	100.01		83.6861
70470/R1-MP31	39.64	15.39	0.21	44.42	0.24	0.03	0.23	100.16		83.7222
70470/R1-MP12	39.64	15.34	0.2	44.33	0.19	0.03	0.19	99.92		83.7389
70470/R2-MP17	39.69	15.27	0.24	44.13	0.25	0.03	0.23	99.84		83.7396
70470/R2-MP19	39.86	15.2	0.2	44.39	0.24	0.02	0.26	100.17		83.8817
70470/R1-MP25	39.53	15.16	0.21	44.38	0.25	0.03	0.22	99.78		83.9142
70470/R2-MP18	39.62	15.07	0.23	44.24	0.24	0.03	0.24	99.67		83.9519
70470/R1-MP44	39.62	15.03	0.18	44.39	0.23	0.05	0.25	99.75		84.0332
70470/R1-MP41	39.63	15.09	0.2	44.58	0.24	0.04	0.24	100.02		84.037
70470/R1-P3 rim	39.58	14.82	0.21	44.45	0.18	0.02	0.25	99.51		84.239
70470/R2-MP12	39.54	14.87	0.2	44.65	0.24	0.04	0.24	99.78		84.2539
70470/R1-MP26	39.64	14.81	0.2	44.62	0.16	0.03	0.25	99.71		84.2986
70470/R2-MP4	39.58	14.75	0.2	44.76	0.22	0.04	0.25	99.8		84.3935
70470/R3-P5 rim	39.77	14.67	0.21	44.74	0.19	0.03	0.25	99.86		84.4592
70470/R2-MP7	39.81	14.49	0.19	45.02	0.21	0.02	0.27	100.01		84.7015
70470/R1-MP39	39.57	14.56	0.2	45.24	0.22	0.02	0.27	100.08		84.7023
70470/R1-MP30	39.56	14.41	0.19	44.84	0.22	0.02	0.28	99.52		84.7213
70470/R2-MP3	39.74	14.42	0.21	45.02	0.2	0.03	0.27	99.89		84.7642
70470/R2-MP6	39.64	14.31	0.19	45.07	0.21	0.03	0.26	99.71		84.8771
70470/R1-MP53	39.49	14.31	0.2	45.13	0.22	0.03	0.3	99.68		84.8941
70470/R2-MP24	39.88	14.3	0.19	45.12	0.21	0.02	0.29	100.01		84.9003
70470/R1-P9 core	39.79	13.66	0.18	45.61	0.16	0.02	0.28	99.7		85.6115
70470/R3-P7 core	40.06	13.24	0.19	46.15	0.03	0	0.37	100.04		86.1331
70470/R3-P5 core	39.85	13.15	0.18	46.16	0.08	0.03	0.4	99.85		86.2169
70470/R1-P2 core	39.95	12.96	0.19	46.01	0.08	0.01	0.3	99.5		86.3506
70470/R3-P8 core	39.94	12.96	0.19	46.29	0.11	0.03	0.26	99.78		86.422
70470/R3-P2 core	40.13	12.84	0.19	46.43	0.1	0.02	0.27	99.98		86.5659
70470/R2-P2 core	40.19	12.13	0.15	47.07	0.16	0.05	0.36	100.11		87.3657
70470/R3-P4 core	40.38	11.94	0.16	46.92	0.07	0.03	0.37	99.87		87.5041
70470/R3-P1 core	40.35	11.91	0.16	47.08	0.05	0.02	0.29	99.86		87.5687
70470/R2-P4 rim	40.4	11.76	0.17	47.33	0.07	0.02	0.37	100.12		87.763
70470/R1-P10 core	40.3	11.5	0.15	47.15	0.1	0.01	0.33	99.54		87.9608
70470/R2-P4 core	40.22	11.36	0.19	47.78	0.07	0.01	0.36	99.99		88.2284
70470/R1-P7 core	40.53	10.73	0.16	48.21	0.05	0.02	0.32	100.02		88.8969
70470/R1-P2 core	40.48	10.18	0.15	48.74	0.16	0.07	0.37	100.15		89.5089
70470/R3-P6 core	40.8	9.94	0.17	48.76	0.05	0.02	0.37	100.11		89.7346
70470/R1-P1 core	40.61	9.86	0.18	48.87	0.04	0.02	0.3	99.88		89.8294
70470/R1-P6 core	40.79	9.82	0.19	49.18	0.03	0.03	0.35	100.39		89.9239
70470/R1-P3 core	40.65	9.57	0.16	48.95	0.11	0.01	0.39	99.84		90.1135
70470/R3-P3 core	40.64	9.57	0.17	49.16	0.06	0.02	0.38	100		90.1516
70470/R3-P8 core	40.83	9.54	0.16	49.28	0.04	0	0.39	100.24		90.201
70470/R1-P5 core	40.7	9.21	0.14	49.15	0.06	0.01	0.38	99.65		90.485
70470/R2-P1 core	40.97	8.52	0.15	50.03	0.03	0	0.4	100.1		91.277
Upper Volcanic Series
70453/1-OL13	39.5139	13.6898	0.2564	45.7785	0.2333	0.026	0.1369	99.6349		85.63
70453/1-OL25	40.077	13.4216	0.2753	45.8865	0.3996	0.0097	0.0808	100.15		85.9004
70453/1-OL53	39.6614	13.32	0.2602	45.9194	0.4061	0.0168	0.0948	99.6787		86.0008
70453/1-OL17	40.2158	12.9699	0.227	46.6983	0.2587	0.0275	0.108	100.505		86.5158
70453/1-OL41	39.8281	12.8632	0.2173	46.4482	0.2118	0.0381	0.15	99.7566		86.5495
70453/1-OL39	39.85	12.8528	0.2609	46.4199	0.2663	0.0414	0.1276	99.8189		86.5518
70453/1-OL20	40.0562	12.8972	0.2489	46.6165	0.3369	0.0243	0.0083	100.188		86.5608
70453/1-OL15	39.7268	12.891	0.2388	46.6277	0.2799	0.0238	0.107	99.895		86.5693
70453/1-OL37	40.1837	12.863	0.2379	46.6133	0.2512	0.0183	0.1322	100.3		86.5909
70453/1-OL31	40.019	12.6395	0.2238	46.6591	0.2186	0.0195	0.1422	99.9217		86.8044
70453/1-OL51	40.1985	12.6338	0.221	46.6585	0.2131	0.058	0.1494	100.132		86.8094
70453/1-OL21	39.7469	12.4985	0.2114	46.5043	0.2004	0.0367	0.1229	99.3211		86.8946
70453/1-OL32	40.0015	12.5157	0.2067	46.5925	0.1647	0.0409	0.1935	99.7155		86.9005
70453/1-OL34	40.3436	12.3363	0.2205	46.7748	0.1963	0.0247	0.1724	100.069		87.1078
70453/1-OL54	40.1017	12.3584	0.2203	46.9281	0.1818	0.0199	0.1841	99.9943		87.1245
70453/1-OL49	39.8601	12.355	0.1849	46.9708	0.1908	0.0289	0.1767	99.7671		87.1378
70453/1-OL11	39.3579	12.1809	0.2131	46.7424	0.1983	0.0357	0.1626	98.891		87.2419
70453/1-OL29	40.1067	12.231	0.2048	47.042	0.1911	0.0276	0.1721	99.9753		87.2673
70453/1-OL27	40.1328	12.2413	0.1813	47.0857	0.1821	0.0474	0.1957	100.066		87.2682
70453/1-OL36	40.3647	12.203	0.2098	47.0774	0.1791	0.0429	0.1703	100.247		87.3011
70453/1-OL18	40.0428	12.1167	0.2264	47.1796	0.1829	0.0406	0.1512	99.9402		87.4034
70453/1-OL50	39.8305	12.1312	0.1818	47.298	0.1778	0.0453	0.186	99.8506		87.4179
70453/1-OL2	39.8157	12.1082	0.2052	47.2304	0.1488	0.0345	0.093	99.6359		87.423
70453/1-OL28	40.6096	12.0229	0.2031	47.2228	0.1812	0.0273	0.1812	100.448		87.4988
70453/1-OL1	39.868	11.9261	0.2124	47.2721	0.1444	0.0461	0.1889	99.658		87.5982
70453/1-OL35	40.2845	11.8616	0.2193	47.2678	0.2514	0.0677	0.2169	100.169		87.656
70453/1-OL38	40.3941	11.7944	0.1977	47.5584	0.1699	0.0503	0.2171	100.382		87.7833
70453/1-OL24	40.3379	11.6652	0.1974	47.3955	0.1656	0.0388	0.2018	100.002		87.8644
70453/1-OL45	40.2785	11.5422	0.1764	47.5897	0.1563	0.0558	0.2347	100.034		88.0201
70453/1-OL33	40.1854	11.5635	0.1964	47.7081	0.1634	0.0523	0.2211	100.09		88.027
70453/1-OL43	39.9753	11.5035	0.1887	47.551	0.1638	0.0609	0.2272	99.6703		88.047
70453/1-OL12	40.0525	11.4054	0.1771	47.7757	0.1614	0.0507	0.2284	99.8513		88.186
70453/1-OL30	40.1178	11.3697	0.1812	47.699	0.1694	0.0569	0.234	99.828		88.2019
70453/1-OL3	40.199	11.4101	0.1878	48.0838	0.1611	0.0495	0.2408	100.332		88.2486
70453/1-OL10	39.8785	11.2539	0.1707	47.7104	0.1565	0.0374	0.2459	99.4533		88.3105
70453/1-OL19	40.1106	11.1976	0.1655	47.7832	0.1648	0.0347	0.1696	99.626		88.3779
70453/1-OL9	40.0129	11.2159	0.1814	47.9443	0.1623	0.0462	0.234	99.797		88.3956
70453/1-OL26	40.3143	11.1607	0.1673	47.9595	0.1499	0.0596	0.2496	100.061		88.4494
70453/1-OL6	40.2729	11.1059	0.166	47.9507	0.1525	0.0584	0.2647	99.9711		88.4977
70453/1-OL42	40.1979	11.1023	0.1903	48.0505	0.1563	0.0762	0.2476	100.021		88.5221
70453/1-OL46	40.208	11.0769	0.1858	48.0551	0.1604	0.0398	0.2346	99.9606		88.5464
70453/1-OL48	40.1253	10.9489	0.1702	48.1698	0.1549	0.0532	0.269	99.8913		88.6876
70453/1-OL40	40.3099	10.7819	0.1811	48.0773	0.1533	0.0572	0.2536	99.8143		88.8219
70453/1-OL47	40.3012	10.6057	0.1631	48.4202	0.1457	0.0508	0.2653	99.952		89.0539
70453/1-OL23	40.599	10.4523	0.1621	48.5938	0.1502	0.0536	0.2841	100.295		89.2296
70453/1-OL14	39.9723	10.353	0.1467	48.4953	0.1446	0.0917	0.3052	99.5087		89.3016
70453/1-OL52	40.3058	10.2498	0.1765	48.7664	0.1492	0.0685	0.3064	100.023		89.4496
70453/1-OL7	40.328	10.0296	0.173	48.8939	0.1429	0.0564	0.3013	99.9251		89.6771
70453/1-OL16	40.5997	9.33621	0.1583	49.5142	0.1629	0.1324	0.3603	100.264		90.4313

## Sheet: Cpx
Table S4: Clinopyroxene mineral chemistry from Christmas Island volcanic rocks
Sample no.	SiO2	TiO2	Al2O3	Cr2O3	FeO	MnO	MgO	CaO	Na2O	Total		Mg#
Lower Volcanic Series
70480-cpx12	50.0124	1.39723	3.67522	0.2628	6.74269	0.1844	15.3752	20.204	0.471528	98.3255		80.2506
70480-cpx13	50.0388	1.45443	4.69929	0.6056	6.27785	0.1232	15.4459	20.4903	0.463613	99.599		81.4277
70480-cpx15	50.6274	1.35443	3.98333	0.1997	6.23505	0.1465	15.427	21.1731	0.399486	99.546		81.5126
70480-cpx5	49.6252	1.51437	4.58296	0.4548	6.13426	0.1435	15.3674	20.8411	0.452791	99.1164		81.6991
70480-cpx14	49.894	1.59115	4.50424	0.4516	6.0217	0.1376	15.1606	21.2193	0.404095	99.3843		81.7733
70480-cpx11	50.7787	1.28372	4.33839	0.5287	6.28077	0.1725	16.1077	19.6551	0.479143	99.6247		82.047
70480-cpx1	50.4638	1.39948	3.75056	0.5104	5.99699	0.137	15.6827	20.9426	0.43175	99.3153		82.3324
70480-cpx3	50.769	1.06521	3.58584	0.7287	6.15547	0.135	16.215	20.0343	0.475937	99.1644		82.4383
70480-cpx19	50.1411	1.2608	3.63535	0.6968	5.7351	0.1397	15.6548	21.1654	0.437561	98.8666		82.9475
70480-cpx17	51.0674	0.960804	3.43383	0.5491	5.98211	0.1572	16.6349	19.649	0.434555	98.8689		83.2083
70480-cpx4	50.3003	1.43445	3.7687	0.6187	5.64462	0.1386	15.7177	21.0746	0.361912	99.0596		83.2272
70480-cpx20	49.8206	1.28	3.98631	1.042	5.44878	0.1378	15.3842	20.9883	0.447381	98.5353		83.4199
70480-cpx21	51.5713	0.905467	3.00518	0.6797	5.73986	0.1517	16.2617	20.805	0.443673	99.5636		83.4673
70480-cpx16	50.5705	1.19048	3.51009	0.583	5.47174	0.1447	15.6332	21.2615	0.503391	98.8686		83.5832
70480-cpx6	51.0727	1.21144	3.13966	0.4759	5.44742	0.1036	15.8731	21.3043	0.349889	98.978		83.8514
70480-cpx8	51.1077	1.20478	3.00395	0.3011	5.24915	0.1506	16.1074	21.7332	0.331553	99.1894		84.5397
70480-cpx2	51.3013	0.977748	3.12265	1.0125	5.22279	0.1586	16.4304	20.6368	0.46241	99.3252		84.8622
70480-cpx9	50.8296	1.13465	3.43793	1.1069	5.00779	0.1523	15.9584	21.3269	0.410909	99.3654		85.027
70480-cpx10	51.216	1.11291	2.88721	0.591	4.90885	0.1307	16.1776	21.6613	0.352995	99.0386		85.4498
70480-cpx18	52.0322	0.914968	2.59754	0.9047	4.93764	0.1265	16.6005	20.8958	0.407502	99.4173		85.6961
70480-cpx7	51.6669	0.950031	2.75303	0.4888	4.86244	0.1137	16.6542	21.2702	0.370028	99.1293		85.9223
Upper Volcanic series
70453/2-cpx2 rim	43.0239	3.72089	9.86588	0.0481	8.28982	0.1355	11.1896	23.0338	0.341973	99.6495		70.6344
70453/2-cpx3 rim	43.7259	3.40679	8.36242	0.0792	7.77557	0.0874	11.6463	23.2656	0.295582	98.6448		72.7453
70453/2-cpx7 core	43.4565	3.30523	8.78369	0.1754	7.57545	0.1121	11.816	23.2402	0.304499	98.7691		73.5415
70453-cpx7 rim	44.9573	2.82189	7.24384	0.0019	7.68432	0.1369	12.2418	22.9877	0.281855	98.3575		73.9507
70453/2-cpx7 rim	47.3029	2.30456	6.19322	-0.0141	7.47642	0.1611	13.0982	23.1728	0.324739	100.02		75.7396
70453-cpx1 rim	47.043	2.23101	5.92601	0.0041	7.50443	0.1398	13.2376	23.204	0.252798	99.5428		75.8652
70453/2-cpx2 core	44.8427	2.88486	8.00019	0.454	6.8964	0.1288	12.506	23.199	0.227849	99.1398		76.3676
70453/2-cpx3 core	45.3947	2.69153	7.43254	0.3609	6.81186	0.1144	12.4594	23.2787	0.284159	98.8282		76.5226
70453/2-cpx1 rim	45.9055	2.6453	6.99989	0.413	6.54782	0.0911	12.8145	23.4006	0.275342	99.0931		77.7158
70453/2-cpx1 core	46.78	2.29907	6.71792	0.6921	6.1578	0.1153	13.3204	23.3199	0.29979	99.7022		79.4017
70453/2-cpx8 rim	46.5265	1.98478	5.68606	0.4047	5.93249	0.1089	13.1882	23.6361	0.27935	97.7471		79.8447
70453-cpx11	47.7877	1.99183	5.87097	0.7546	5.66359	0.1193	13.7772	23.5716	0.286163	99.8229		81.2553
70453-cpx10	47.6288	1.92278	5.59022	0.6473	5.55755	0.1297	13.9351	23.5052	0.295782	99.2125		81.7125
70453-cpx2	48.1761	1.93463	5.79778	0.7923	5.54432	0.1088	13.9698	23.6068	0.273639	100.204		81.7851
70453-cpx7 core	47.5571	1.82543	5.6344	0.8095	5.4698	0.094	13.8881	23.5249	0.24889	99.0522		81.8991
70453/2-cpx8 core	47.2069	1.93062	5.67529	0.8008	5.48001	0.0938	13.9594	23.6338	0.268428	99.049		81.9472
70453-cpx6	48.0589	1.82337	5.42724	0.6804	5.39168	0.1003	14.087	23.697	0.24869	99.5146		82.3192
70453-cpx3	48.8893	1.54365	5.2612	0.6865	5.423	0.1085	14.2701	23.6336	0.264721	100.081		82.4226
70453/2-cpx5	49.5013	1.551	4.13155	0.2105	5.56018	0.0959	14.7262	23.583	0.233259	99.5929		82.5164
70453-cpx12	49.957	1.37049	3.75968	0.1996	5.25771	0.1073	14.98	23.8122	0.241576	99.6856		83.545
70453-cpx9 rim	49.8832	1.45835	4.47113	0.5085	5.0467	0.1147	14.7491	23.8371	0.232858	100.302		83.8915
70453-cpx8	51.2281	1.25316	3.35132	0.3818	4.97471	0.1147	15.3903	23.5308	0.204202	100.429		84.646
70453-cpx4	51.4128	1.18235	3.01287	0.3556	4.66738	0.1172	15.4595	23.6425	0.214322	100.065		85.5123
70453-cpx13	51.1256	1.1416	3.05725	0.4193	4.63382	0.0975	15.558	23.7657	0.245383	100.044		85.6796
70453/2-cpx4	50.3685	1.08656	3.33697	0.4352	4.59627	0.1011	15.4351	23.1164	0.176748	98.6528		85.6821
70453-cpx5	50.8755	1.09792	2.8869	0.4438	4.54704	0.087	15.5735	23.7554	0.199393	99.4664		85.922
70453-cpx1 core	51.4873	1.06119	2.82017	0.4435	4.4268	0.1109	15.7478	23.7044	0.232157	100.034		86.3746
