# Supplementary material for: Petrogenesis of Lava from Christmas Island, Northeast Indian Ocean: Implications for the Nature of Recycled Components in Non-Plume Intraplate Settings
Source: MDPI journal article supplement (doi:10.3390/geosciences12030118), 2022-03-03
Supplement: s1 [file s1 › geosciences-1514323_supplementary Table S5.xlsx]

## Sheet: Data
Table S5: Geochemistry of volcanic rocks from Christmas Island
Sample no	Sample reference	Laboratory	XRF/ICP-ES	SiO2	TiO2	Al2O3	FeOT	MnO	MgO	CaO	Na2O	K2O	P2O5	LOI	XRF	Rb	Ba	Sr	Zr	Nb	Y	Sc	V	Ni	Cr	Zn	Cu	Pb	Th	U	La	Ce	Nd	Laboratory	ICPMS/INAA	La	Ce	Pr	Nd	Sm	Eu	Gd	Tb	Dy	Ho	Er	Tm	Yb	Lu
Lower Volcanic Series
CH5A	Hoernle et al (2011)	ACME	ICP-ES	60.41	0.36	17.66	6.68	0.23	0.97	2.3	5.25	6.04	0.09	2.2																				ACME	ICPMS	108.5	231.3	23.55	85	13.9	2.85	10.28	1.75	9.05	1.66	4.41	0.62	3.78	0.55
CH5B	Hoernle et al (2011)	ACME	ICP-ES	60.57	0.36	17.57	6.73	0.24	0.87	2.34	5.24	5.99	0.09	2.1																				ACME	ICPMS	112.1	234.6	24.3	90.9	14.31	2.87	10.49	1.83	9.42	1.69	4.56	0.64	3.86	0.56
CH6	Hoernle et al (2011)	ACME	ICP-ES	61.11	0.27	17.9	6.32	0.19	0.42	2.33	5.53	5.88	0.05	2.7																				ACME	ICPMS	129.7	273.1	28.19	104	16.44	2.49	12.25	2.09	10.7	2.03	5.19	0.75	4.48	0.66
CH8	Hoernle et al (2011)	ACME	ICP-ES	53.07	1.03	20.67	8.44	0.16	3.35	9.8	3.01	0.37	0.11	2.5																				ACME	ICPMS	3.5	10	1.44	7.4	2.38	0.89	3.01	0.55	3.18	0.7	2.02	0.3	1.93	0.3
CH9	Hoernle et al (2011)	ACME	ICP-ES	45.41	3.7	12.14	12.34	0.17	11.06	9.69	2.37	2.06	1.05	3.2																				ACME	ICPMS	47.7	108.9	12.64	54.1	9.96	3.38	9.07	1.29	5.96	0.96	2.22	0.29	1.62	0.21
CH10	Hoernle et al (2011)	ACME	ICP-ES	50.71	2.69	14.17	11.37	0.16	7.53	8.31	3.46	1.07	0.52	1.1																				ACME	ICPMS	26.5	59.3	7.02	31.5	6.45	2.19	6.35	0.99	5.05	0.91	2.28	0.3	1.81	0.25
CH11	Hoernle et al (2011)	ACME	ICP-ES	47.85	3.27	12.77	11.56	0.17	10.29	9.22	2.78	1.57	0.54	1.5																				ACME	ICPMS	43.7	92.3	10.3	42.2	7.79	2.41	6.82	1.06	5.15	0.97	2.26	0.31	1.84	0.25
CH12	Hoernle et al (2011)	ACME	ICP-ES	47.88	3.46	13.29	11.65	0.2	8.8	9.37	2.78	1.82	0.75	2.8																				ACME	ICPMS	54.5	119.2	12.98	50.9	8.21	2.69	6.69	1.06	4.84	0.89	2.18	0.31	1.89	0.25
CH13	Hoernle et al (2011)	ACME	ICP-ES	48.12	3.36	13.09	11.39	0.17	9.29	9.56	2.84	1.64	0.56	1.7																				ACME	ICPMS	43.3	91	10.19	40.9	7.69	2.41	6.64	1.02	5.18	0.95	2.41	0.32	1.81	0.26
SO199-DR55-3	Hoernle et al (2011)	ACME	ICP-ES	44.44	3.36	16.74	11.15	0.11	4.18	11.17	3.59	1.34	3.91	5.1																				ACME	ICPMS	90.2	180.4	22.32	89.8	16.36	5.21	14.21	2.04	9.65	1.65	4.1	0.55	3.02	0.44
70452	1987 Field Season	UTAS	XRF	48.04	3.52	13.11	11.44	0.17	9.51	9.12	2.69	1.77	0.64	1.56		39	491	621	305	59	28	24	230	230	295	109	66	3	5	<1.5	46	89	42	UTAS	ICPMS	51	101.7	12.09	49.8	9.59	2.91	8.4	1.2	6.23	1.06	2.65	0.34	1.93	0.27
70455	1987 Field Season	UTAS	XRF	60.67	0.35	17.97	6.7	0.23	0.77	2.26	5.37	5.57	0.1	2.39		134.5	248	28	871	182	51.5	15	2	4	4	162	4	7	15	3	116	234	95	BECQUEREL	INAA	119	241		105	18.3	3.84		1.82		1.59			4.26	0.63
70456	1987 Field Season	UTAS	XRF	46.35	3.72	13.4	12.35	0.21	9.84	9.46	2.36	1.51	0.8	1.83		31	780	826	256	60	25.5	23	252	190	332	113	33	2	3	2	44	89	44
70467	1987 Field Season	UTAS	XRF	45.75	3.6	12.22	12.23	0.19	10.26	10.79	2.59	1.26	1.1	3.94		23	599	1058	281	80	30	21	205	223	322	135	49	<1.5	3	<1.5	52	106	53
70469	1987 Field Season	UTAS	XRF	48.61	2.95	12.22	11.57	0.16	10.67	9.2	2.76	1.21	0.64	2.05		25.5	422	569	203	45	26	22	186	243.5	482	121	42	3	4	<1.5	32	68	34	BECQUEREL	INAA	31.8	67.3		39.7	8.5	2.87		1.1		0.9			1.6	0.17
70470	1987 Field Season	UTAS	XRF	44.26	3.71	11.2	12.29	0.18	13.87	9.89	2.33	1.25	1.02	3.16		26	595	929	241	69	27	20	210	287	496	128	40	<1.5	5	<1.5	54	110	52
70471	1987 Field Season	UTAS	XRF	46.53	3.05	12.91	11.42	0.17	10.9	9.71	3.25	1.35	0.73	1.71		28	446	663	221	57	28	22	194	216	302			1.5						UTAS	ICPMS	41.3	80.6	9.63	42.3	9.25	3.03	8.73	1.21	6.25	1.02	2.46	0.3	1.72	0.23
70472	1987 Field Season	UTAS	XRF	46.07	3.29	11.29	11.81	0.17	16.13	7.88	1.48	1.29	0.58	5.49		21.5	250	297	283	60	22.5	18	225	435	551			2.5	3	<1.5	42	80	40
70473	1987 Field Season	UTAS	XRF	52.07	2.88	16.35	9.49	0.11	4.61	6.88	4.32	2.32	0.96	2.13		42	505	651	462	84	38	16	180	98.5	109	123	44	3.5	7	2	60	125	61	BECQUEREL	INAA	59.9	127		68.8	13.5	4.06		1.53		1.12			2.54	0.38
70474	1987 Field Season	UTAS	XRF	44.68	3.72	13.14	13.18	0.16	10.41	9.82	2.75	1.17	0.97	2.74		22	610	961	253	68	28	21	222	184	366	128	43	2	4	2	56	112	53
70475	1987 Field Season	UTAS	XRF	45.58	3.69	11.88	12.75	0.17	11.33	9.82	2.62	1.19	0.99	2.9		21	580	996	258	70	28.5	21	224	233.5	384	132	47	2	5	2	56	110	53
70476	1987 Field Season	UTAS	XRF	44.73	4	11.77	12.63	0.16	10.84	11.15	2.7	1.32	0.71	2.5		29	434	560	214	54	23	25	227	168.5	281	134	37	<1.5	3	<1.5	27	59	30	BECQUEREL	INAA	27.7	60.4		36.1	8.68	3.04		1.18		1			1.59	0.24
70477	1987 Field Season	UTAS	XRF	49.3	3.12	13.68	11.21	0.15	8.44	9.07	2.95	1.49	0.6	1.94		20.5	336	555	333	56	27.5	24	210	211	328	112	43	<1.5	3	<1.5	42	83	42
70478	1987 Field Season	UTAS	XRF	63.41	0.46	18.26	4.02	0.03	0.41	1.19	6.05	6.02	0.16	2.89		107	95	12	873	164	52.5	16	2	4.5	3	205	1	7.5	18	4	129	261	109
70479	1987 Field Season	UTAS	XRF	47.93	3.23	12.75	11.32	0.17	10.74	9.07	2.79	1.46	0.54	2.59		28.5	418	553	281	61	26.5	24	231	259	337	113	61	3.5	5	<1.5	45	87	40	BECQUEREL	INAA	45.3	91.8		47.8	9.41	2.97		1.04		1.1			2.09	0.25
70480	1987 Field Season	UTAS	XRF	46.36	3.06	10.38	12.43	0.18	13.62	10.23	1.9	1.29	0.54	1.63		29	371	543	242	50	22.5	30	261	398.5	592	109	63	2.8	5	<1.5	38	75	36	UTAS	ICPMS	41.2	83.2	10.02	41.5	7.91	2.41	7.06	1	5.17	0.88	2.19	0.28	1.6	0.22
70481	1987 Field Season	UTAS	XRF	61.02	1.55	19.5	3	0.02	0.33	2.44	6.71	4.81	0.61	2.03		91	1775	718	731	134	49	8	14	1	5									BECQUEREL	INAA	95.2	194		91.8	16.5	6.37		2.09		2.3			3.63	0.44
X-1	Hart (1988)	UTAS	XRF	46.93	3	12.58	11.49	0.16	10.62	9.79	3.25	1.44	0.73	1.16		28	439	674	218	54	26	22	192	220	309									BECQUEREL	INAA	34.5	70.5		38.9	9.57	3.08		1.18		1.19			1.53	0.23
X-2	Hart (1988)	UTAS	XRF	48.87	3.1	13.37	11.46	0.15	9.49	8.55	2.94	1.47	0.58	2.14		22	313	530	323	55	31	19	201	238	317									BECQUEREL	INAA	37.6	80.9		44.2	9.84	2.9		0.97		0.89			2.23	0.27
X-3	Hart (1988)	UTAS	XRF	44.53	3.72	11.06	12.67	0.17	13.41	9.68	2.64	1.09	1.04	2.72		20	600	920	239	67	30	20	531	313	523									BECQUEREL	INAA	52.8	110		58.7	12.2	3.7		1		1.11			1.74	0.23
X-4	Hart (1988)	UTAS	XRF	44.94	4.45	12.1	12.44	0	11.8	10.19	2.33	0.87	0.85	0		18	585	818	258	72	29	21	239	198	405									BECQUEREL	INAA	39.2	85.9		46	10.7	3.6		1.48		1			1.57	0.19
X-5	Hart (1988)	UTAS	XRF	45.64	3.67	12.21	12.43	0.17	10.29	9.6	2.69	2.21	1.09	2.01		33	580	1061	281	80	33	20	202	221	321									BECQUEREL	INAA	50.9	112		66	13	4		1.6		1.2			1.79	0.2
Upper Volcanic Series
CH1A	Hoernle et al (2011)	ACME	ICP-ES	45.36	2	12.74	10.28	0.19	11.51	12.77	1.96	2.58	0.61	2.3																				ACME	ICPMS	56	122.8	13.63	54.1	9.52	2.87	6.93	1.01	4.75	0.77	1.85	0.25	1.47	0.22
CH1B	Hoernle et al (2011)	ACME	ICP-ES	45.02	2.02	12.78	10.32	0.19	11.76	12.95	1.87	2.51	0.58	2.5																				ACME	ICPMS	55.7	119.9	13.64	54.1	9.45	2.91	6.93	0.99	4.47	0.78	1.91	0.25	1.53	0.21
CH2	Hoernle et al (2011)	ACME	ICP-ES	45.13	1.96	12.38	10.22	0.19	12.46	12.89	1.88	2.34	0.57	2.7																				ACME	ICPMS	54	120.6	13.32	53	9.08	2.75	6.61	0.96	4.44	0.73	1.81	0.25	1.37	0.22
CH3	Hoernle et al (2011)	ACME	ICP-ES	45.26	1.97	12.47	10.32	0.19	12.28	12.82	1.87	2.27	0.55	2.3																				ACME	ICPMS	55.2	121.4	13.46	53.4	9.27	2.83	6.69	0.97	4.6	0.77	1.82	0.26	1.39	0.21
CH4	Hoernle et al (2011)	ACME	ICP-ES	44.96	1.99	12.76	10.38	0.19	11.97	12.9	1.91	2.38	0.57	2.7																				ACME	ICPMS	53.7	117.1	13.13	54.8	9.16	2.75	6.86	0.95	4.38	0.76	1.81	0.25	1.44	0.2
CH7A	Hoernle et al (2011)	ACME	ICP-ES	42.52	2.31	11.28	11.26	0.19	15.39	12.88	1.78	1.83	0.57	2.6																				ACME	ICPMS	54.4	115.4	13.03	52.7	8.83	2.68	6.36	0.92	4.16	0.71	1.78	0.23	1.28	0.18
CH7B	Hoernle et al (2011)	ACME	ICP-ES	42.68	2.31	11.03	11.33	0.19	15.63	12.85	1.67	1.74	0.58	2.5																				ACME	ICPMS	53.7	115.8	13.01	51.2	8.84	2.65	6.27	0.91	4.16	0.69	1.61	0.23	1.25	0.18
70453	1987 Field Season	UTAS	XRF	43.13	2.31	11.14	11.52	0.2	15.38	12.8	1.37	1.52	0.62	3		34	1221	1154	206	55	22	38	359	288	1419	100	52	9.8	2	7	59	116	56	UTAS	ICPMS	61.5	119.4	13.85	57.7	10.66	3.12	7.44	1.06	4.7	0.78	1.86	0.23	1.39	0.18
70454	1987 Field Season	UTAS	XRF	43.2	2.32	11.16	11.38	0.2	14.96	12.69	1.79	1.72	0.59	2.5		36	1229	1247	217	58	21	39	348	265	1321	96	50	10	<1.5	9	60	122	57
70457	1987 Field Season	UTAS	XRF	45.68	2.05	13.38	10.5	0.18	10.04	13.95	1.68	1.95	0.6	3.41		43.5	1440	1124	270	57	24.5	45	375	110.5	543	96	50	9.2	<1.5	8	60	129	61	UTAS	ICPMS	63.9	122.42	15	61	11.34	3.27	8.46	1.11	5.31	0.86	2.15	0.26	1.54	0.22
70458	1987 Field Season	UTAS	XRF	45.74	2.03	12.75	10.64	0.19	12.17	12.97	1.31	1.6	0.61	3.89		39	1378	995	257	56	21.5	40	346	174.5	811	96	47	10	2	7	57	122	58
70459	1987 Field Season	UTAS	XRF	45.25	2.02	12.82	10.33	0.19	11.39	13.66	1.58	2.16	0.6	3.64		49	1325	1122	252	55	22	39	341	149	710	94	48	11	2	7	60	125	58
70461	1987 Field Season	UTAS	XRF	45.62	1.95	12.58	10.3	0.19	11.91	12.5	1.98	2.35	0.61	2.53		51	1356	1180	252	55	22.5	42	326	167	778	96	50	9	<1.5	7	59	121	58	UTAS	ICPMS	60.5	117.46	14.34	57.1	10.44	3.02	7.87	1.04	5.07	0.81	2.01	0.24	1.45	0.22
70462	1987 Field Season	UTAS	XRF	45.74	2	12.6	10.33	0.19	11.76	12.73	1.83	2.26	0.57	2.58		48.5	1414	1180	258	57	23	41	340	169.5	812	97	50	10.8	2	7	61	122	60	UTAS	ICPMS	63.2	121.25	14.78	58.8	10.61	3.09	7.93	1.07	5.09	0.81	2.02	0.25	1.5	0.22
70463	1987 Field Season	UTAS	XRF	45.72	1.99	12.74	10.4	0.19	11.89	12.51	1.66	2.33	0.59	2.65		52.5	1389	1192	253	55	23	45	339	169	787	99	49	9	<1.5	7	59	119	60
70482	1987 Field Season	UTAS	XRF	45.57	1.73	11.82	9.88	0.18	14.04	11.52	2.33	2.48	0.5	1.63		55	1333	1134	171	43	19.5	42	293	337	1649	89	48	9	2	6	46	97	45	UTAS	ICPMS	47.8	95.11	11.7	46.6	8.43	2.38	6.32	0.85	4.3	0.72	1.86	0.23	1.41	0.21
Vening Meinesz Volcanic Province
70485-1	FR9_87 RV Franklin	UTAS	XRF	55.66	1.96	19.48	6.21	0.1	0.96	5.65	4.65	4.17	1.16	3.33		59	1299	870	543	102	34	11	72	11	7	131	20	8	11	3	101	191	74	UTAS	ICPMS	101	195		78.6	12.7	3.62		1.16		1.41			3.07	0.42
70488-2	FR9_87 RV Franklin	UTAS	XRF	48.1	3.45	16.6	10.56	0.19	4.5	10.83	3	1.95	0.81	4.5		32.5	781	12	300	58	27	30	296	91	285	113	47	3	3	<1.5	53	108	49	UTAS	ICPMS	64.9	126.95	18.06	61.48	10.55	3.32	8.65	1.22	6.43	1.16	2.89	0.38	2.27	0.32
70488-5	FR9_87 RV Franklin	UTAS	XRF	48.3	3.48	16.72	10.43	0.18	4.34	10.34	3.31	2.12	0.78	4.14		43	746	865	297	57	29.5	29	288	83.5	289	115	46	2	4	<1.5	54	110	49	UTAS	ICPMS	64.2	127.97	18.09	61.55	10.6	3.4	8.8	1.24	6.47	1.19	2.9	0.38	2.27	0.33
[truncated: 18 more columns]

## Sheet: Standards XRF traces
Element		TASBAS					AGV-1				BHVO-1				BIR-1				Detection Limits
		This Study - UTAS		Published			This Study - UTAS		Published		This Study - UTAS		Published		This Study - UTAS		Published		UTAS
		Av	Std				Av	Std			Av	Std			Av	Std
		n=2					n=3				n=3				n=3
Sc		6.7	0.282843	14.35			33.55	0.55	12.3		40.0333	1.80093	31		13.8	0.72111	43		1.5
V		25.85	0.212132	157			317.6	0	119		313.267	7.65659	318		153.267	1.10151	311		1.5
Cr		8.95	0.0707107	182.5			288.95	1.55	9.4		381.033	17.5603	287		179.1	3.67696	376		1
Ni		151.55	0.636396	150			14.9333	0.602771	15.5		121.733	0.665833	118		162.867	0.351188	168		1
Cu		65.4454	0.686601	63			60.4286	1.01065	58		144.323	0.78485	137		128.399	0.568954	119		1
Zn		120.1	0.848528	116			85.7333	0.862168	87		107.033	1.18462	106		68	1.3	70.5		1
Rb		16.65	0.353553	16.4			68.5667	0.46188	66.6		9.36667	0.152753	9.19		0.133333	0.152753	0.24		0.5
Sr		147.25	1.06066	1008			388.5	0	660		107.3	0.707107	396		1003.37	0.702377	109		1
Y		19.3573	0.286421	19.5			18.0689	0.308376	19		25.4328	0.463002	26		14.8133	0.116625	16		1
Zr		165.2	0.848528	259			172.35	0.85	231		14.45	0.777817	174		259.667	0.832666	16.2		1
Nb		14.05	0.777817	58			17.05	0.45	14.6		0.1	0.141421	18.6		55.4667	0.51316	0.55		1
Ba		438	0.282843	186.5			133.3	2.4	1200		3.26667	0.602771	133		202.167	7.1122	6.75		4
La		38.6	0.424264	44.48			17.0556	0.607667	38.2		0.466667	0.929157	15.5		43.7667	0.57735	0.595		2
Ce		83.8	0.565685	85.45			38.0111	0.98338	67.6		1.5	1.17898	38.1		86	0.8544	1.9		4
Nd		35.65	0.0707107	40.2			24.9889	0.616742	31.7		1.8	0.360555	24.7		39.6333	1.37961	2.42		2
Pb		5.29245	0.212132	4.56			35.0193	0.585947	37.4		3.80623	0.757188	2.4		2.77447	0.80829	2.9		1.5
Th		5.4	1.27279	4.87			5.63333	0.85049	6.4		<1.5		1.23		<1.5		0.03		1.5
U		2.1	0.707107	1.89			2	0.1	1.93		<1.5		0.409		<1.5		0.0092		1.5

## Sheet: Standards ICPMS
Element	Tafahi				BHVO-1				BIR-1						BHVO-2			Detection Limits
	This Study - UTAS		Published		This Study - UTAS		Published		This Study - UTAS		This Study - Acme		Published		This Study - Acme	Published		UTAS
	Av	Std			Av	Std			Av	Std	Av	Std
	n=4				n=4				n=4		n=2
45 Sc	43.1163	4.24486	46.2		36.6726	2.11085	31		45.3781	3.97016			43					0.02
51 V	296.117	29.9329	300		365.449	30.5636	318		345.829	42.655			311					0.03
53 Cr	50.0088	4.26564	52.4		302.684	15.5117	287		399.587	33.9387			376					0.21
60 Ni	22.4082	1.71224	23.2		126.416	8.58605	118		173.014	12.4501			168					0.05
63 Cu	135.538	7.88043	126.3		149.378	5.5632	137		125.742	5.53831			119					0.08
66 Zn	65.3605	5.11311	62.2		112.241	10.0595	106		71.2783	6.63698			70.5					0.17
85 Rb	1.52991	0.0940824	1.715		9.48761	0.081374	9.19		0.190987	0.00726983	0.15	0.07	0.24		8.4	9.11		0.02
88 Sr	137.457	4.21247	138.2		400.023	10.0587	396		109.999	5.25821	109.55	0.78	109		396.6	396		0.03
89 Y	7.89767	0.118717	9.1		25.3925	0.618693	26		15.0039	0.683646	14.3	0.14	16					0.03
90 Zr	11.7406	0.439456	12.1		175.662	5.91391	174		14.8721	0.789056	14.25	0.21	16.2					0.05
93 Nb	0.41152	0.00765045	0.475		17.9376	0.259707	18.6		0.51729	0.00491066	0.7	0.14	0.55		17	18.1		0.01
133 Cs	0.0601695	0.00904395	0.067		0.0955802	0.00626499	0.101		0.00636877	0.00126045			0.0045					0.02
137 Ba	39.6979	2.06221	42.3		128.298	6.91921	133		6.43856	0.247099	6	0	6.75		126	131		0.09
139 La	0.913564	0.0897159	0.921		14.9712	1.08876	15.5		0.741978	0.0414302	0.6	0	0.595		14.1	15.2		0.01
140 Ce	2.08021	0.262973	2.2		34.5342	3.88997	38.1		1.75642	0.214009	1.95	0.07	1.9		37.6	37.5		0.02
141 Pr	0.352983	0.0316914	0.361		5.15153	0.444569	5.42		0.363481	0.0329772	0.335	0.01	0.38		4.96	5.35		0.01
146 Nd	1.82418	0.0977315	1.89		23.7785	1.53589	24.7		2.31816	0.105915	2.15	0.07	2.42		24.5	23.6		0.03
147 Sm	0.693349	0.0409644	0.71		5.94097	0.449088	6.12		1.09546	0.0744093	1.02	0.01	1.1		5.63	6.07		0.03
153 Eu	0.293376	0.0215287	0.3		2.03872	0.128772	2.09		0.513267	0.0261521	0.49	0.03	0.535		1.88	2.07		0.01
157 Gd	1.02328	0.0595689	1.069		6.03204	0.319573	6.33		1.7976	0.0916549	1.74	0	1.89		5.72	6.24		0.02
159 Tb	0.195464	0.0172196	0.206		0.914337	0.0616581	0.96		0.356765	0.0243848	0.35	0	0.37		0.91	0.92		0.002
163 Dy	1.37033	0.0766592	1.374		5.16315	0.204121	5.31		2.4957	0.0950977	2.28	0.13	2.51		4.61	5.31		0.01
165 Ho	0.315222	0.0200616	0.316		0.973894	0.0416944	0.98		0.565355	0.0247025	0.545	0.01	0.57		0.9	0.98		0.003
166 Er	0.926296	0.0519888	0.95		2.46893	0.0949524	2.55		1.67555	0.0723872	1.515	0.08	1.69		2.33	2.54		0.01
169 Tm	0.13962	0.00924464			0.320208	0.0173412	0.33		0.244079	0.0144342	0.25	0	0.25		0.32	0.33		0.003
172 Yb	0.937157	0.0716133	0.99		1.87705	0.117034	2		1.57055	0.0970564	1.54	0.06	1.65		1.82	2		0.01
175 Lu	0.149677	0.0060558	0.157		0.271256	0.00783538	0.27		0.242891	0.00559476	0.235	0.01	0.25		0.26	0.274		0.002
178 Hf	0.39631	0.0134313			4.26228	0.0917122	4.46		0.57008	0.0178238	0.6	0	0.55		4.4	4.36		0.01
181 Ta	0.0180272	0.00275661	0.022		1.12587	0.143908	1.21		0.036983	0.00439107	0.1	0	0.045		1.1	1.14		0.003
208 Pb	0.842575	0.0384195	0.83		1.82571	0.0255153	2.4		2.78396	0.0849362	2.9		2.9		0.8	1.6		0.03
232 Th	0.109227	0.0127079	0.12		1.21808	0.0711621	1.23		0.0287814	0.00146037	0.2	0	0.03		1.2	1.22		0.004
238 U	0.0711646	0.00338775	0.072		0.422993	0.0124418	0.409		0.00999098	0.000627913	0.1	0	0.0092		0.5	0.403		0.003
