# Supplementary material for: Petrogenesis of Lava from Christmas Island, Northeast Indian Ocean: Implications for the Nature of Recycled Components in Non-Plume Intraplate Settings
Source: MDPI journal article supplement (doi:10.3390/geosciences12030118), 2022-03-03
Supplement: s1 [file s1 › geosciences-1514323_supplementary Table S6.xlsx]

## Sheet: Mass balance
Table S6. Mass balance results for Christmas Island lavas
LVS									UVS
	70476 gdm	Oliv av	Cpx av	Plag av		70480 wr				70454 gdm	Oliv av	Cpx av		70453 wr
SiO2	47.94	39.26	50.71	52.58		46.36			SiO2	44.44	40.1	47.78		43.13
TiO2	4.72	0	1.22	0		3.06			TiO2	2.49	0	2.02		2.31
Al2O3	13.78	0	3.59	29.85		10.38			Al2O3	15.03	0	5.6		11.14
FeO	12.08	16.75	5.69	0.55		12.43			FeO	9.84	11.82	5.96		11.52
MgO	4.98	43.19	15.9	0.28		13.62			MgO	7.43	47.37	13.82		15.38
CaO	10.79	0.24	20.87	12.8		10.23			CaO	13.59	0.19	23.47		12.8
Na2O	3.3	0	0.42	3.78		1.9			Na2O	3.25	0	0.26		1.37
K2O	1.71	0	0	0.34		1.29			K2O	3.04	0	0		1.52
P2O5	0.68	0	0	0		0.54			P2O5	0.89	0	0		0.62
Unconstrained Result for LVS									Unconstrained Result for UVS
Phases	Prop.(%)	N-Prop.(%)	Comp.	Residual					Phases	Prop.(%)	N-Prop.(%)	Comp.	Residual
70476 gdm	67.3296	67.4565	SiO2	-0.189485					70454 gdm	69.0109	69.6092	SiO2	-0.537526
Oliv av	19.4589	19.4956	TiO2	-0.258582					Oliv av	18.1877	18.3454	TiO2	0.350403
Cpx av	11.5268	11.5485	Al2O3	0.241439					Cpx av	11.9419	12.0454	Al2O3	0.0989168
Plag av	1.49661	1.49943	FeO	0.373123					SUM	99.1404	100	FeO	1.86781
SUM	99.8118	100	MgO	0.0257527								MgO	-0.0133777
			CaO	0.321237								CaO	0.584107
			Na2O	-0.42686								Na2O	-0.903903
			K2O	0.133576								K2O	-0.577932
			P2O5	0.082159								P2O5	0.00580295
			SSE	0.610941								SSE	5.40265
Calculations performed using the software Geobalance (Xiaoyan et al., 2020 - Geochemistry 80, 125629)

## Sheet: Petrolog3
Table S6. Petrolog3 modelling results for Christmas Island lavas
LVS								UVS
Parent - wholerock 70480			Daughter - groundmass 70476		Model - daughter			Parent - wholerock 70453			Daughter - groundmass 70454		Model - daughter
SiO2	46.36		47.94		47.39			SiO2	43.13		44.44		42.5
TiO2	3.06		4.72		4.2			TiO2	2.31		2.49		3.32
Al2O3	10.38		13.78		14.09			Al2O3	11.14		15.03		15.85
FeOT	12.43		12.08		12.56			FeO	11.14		9.84		12.43
MgO	13.62		4.98		5.12			MgO	15.38		7.43		5.89
CaO	10.23		10.79		11.42			CaO	12.8		13.49		14.81
Na2O	1.9		3.3		2.64			Na2O	1.37		3.25		2
K2O	1.29		1.71		1.82			K2O	1.52		3.04		2.26
P2O5	0.54		0.68		0.73			P2O5	0.62		0.89		0.92
Phase Proportions (wt%)
Melt					71.6								70
Olivine					18.2								19.7
Clinopyroxene					10.2								10.4
Mg# final olivine composition					76								80
Calculations used Petrolog3 software (Danyushevsky and Plechov 2011) and the models of Ford et al (1983) for olivine and Danyushevsky (2001) for clinopyroxene. For calculations H2O contents of ~1.7 (LVS) and ~2.3 (UVS) were assummed
Oxygen fugacity was QFM+0.5 log units using the model of Borisov and Shapkin (1990)
Pressure was assummed to be at 1atm
